# Supplementary material
Source: PubMed Central journal article supplement (PMC4207267)

**A**

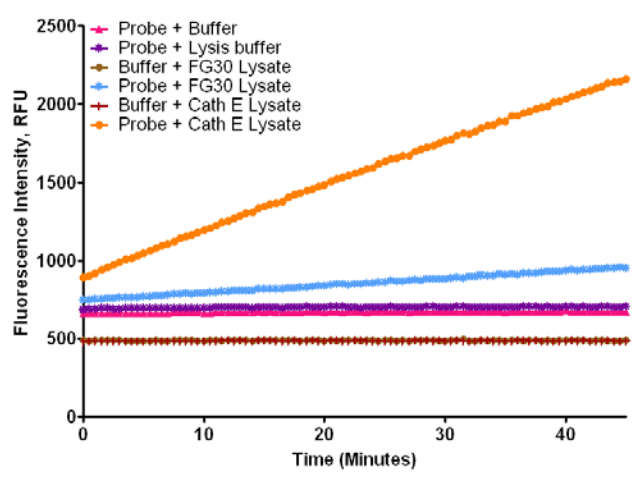

**B**

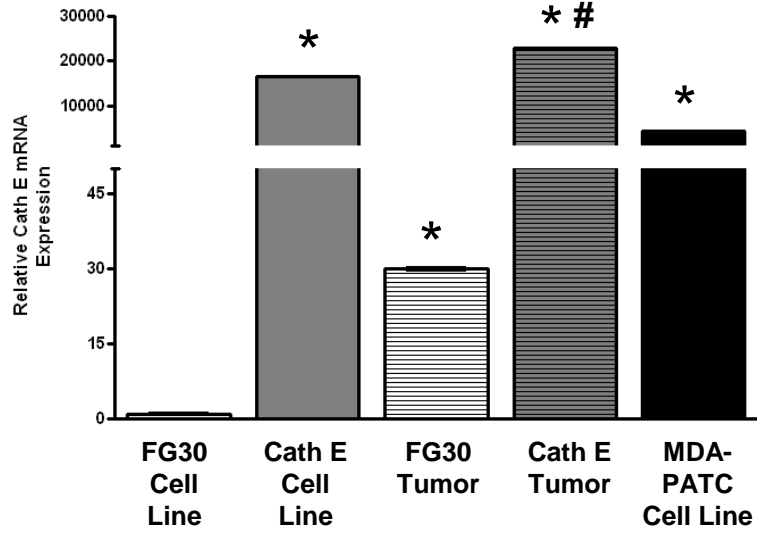

**C**

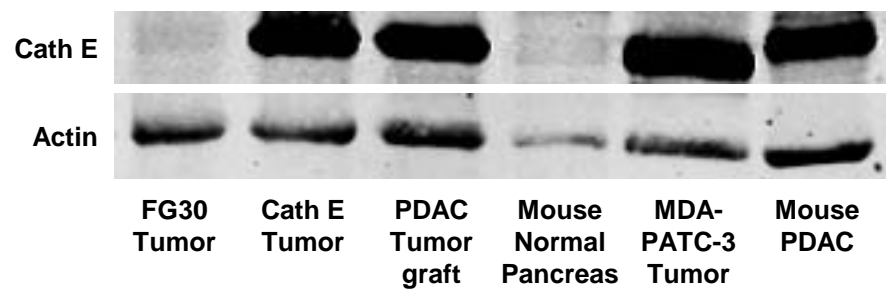

**D**

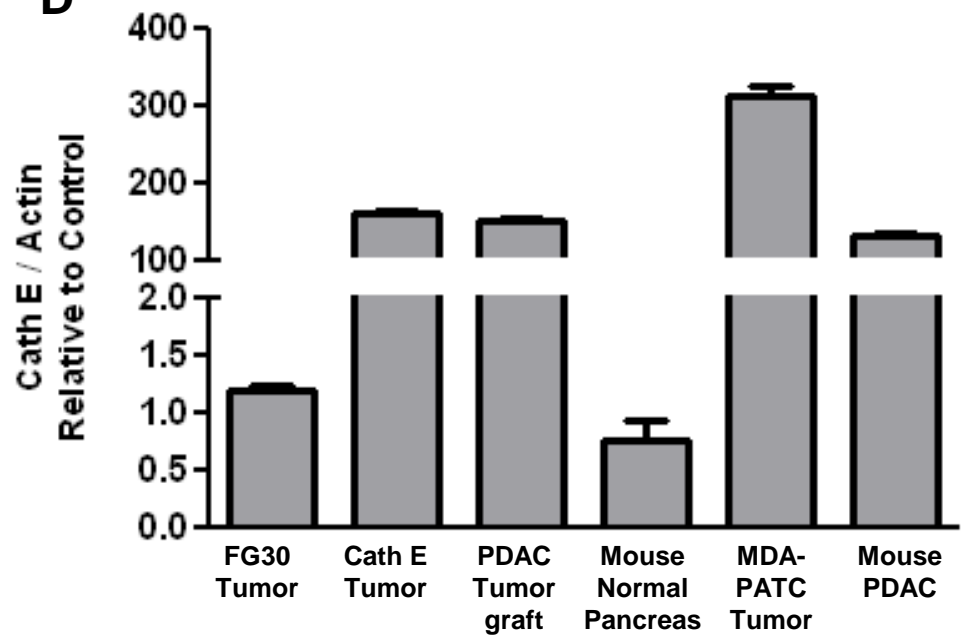

**A**

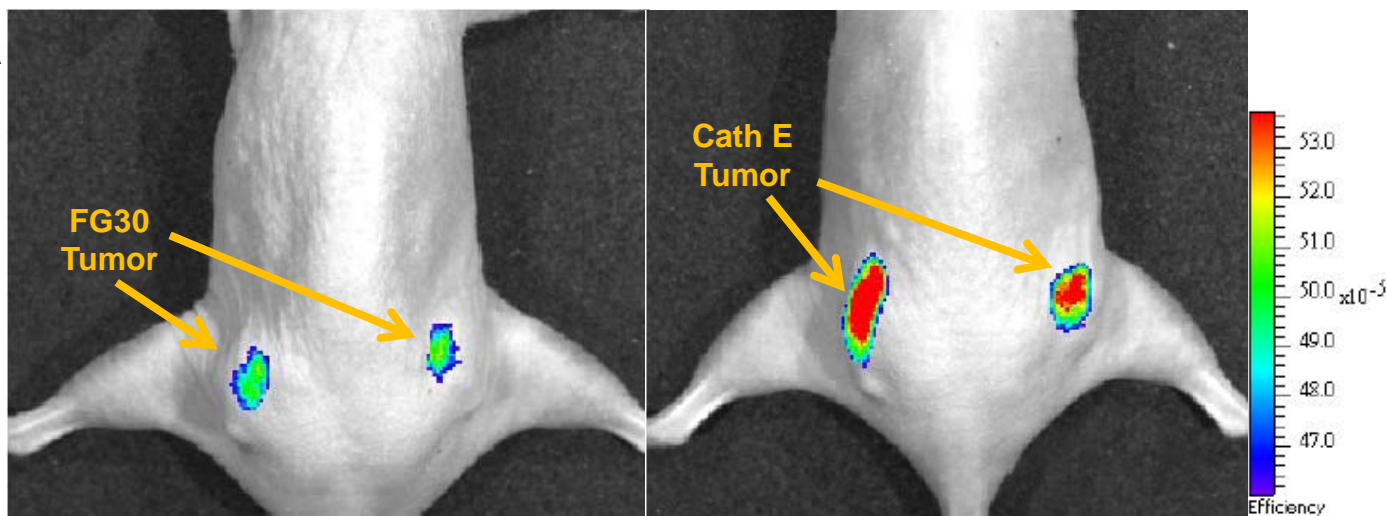

**B**

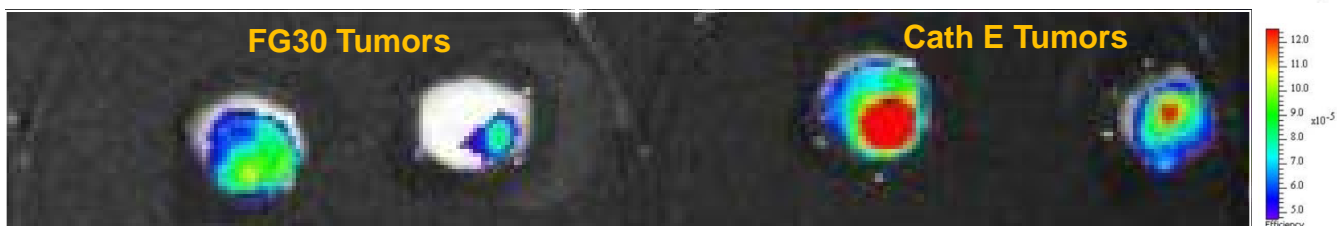

**C**

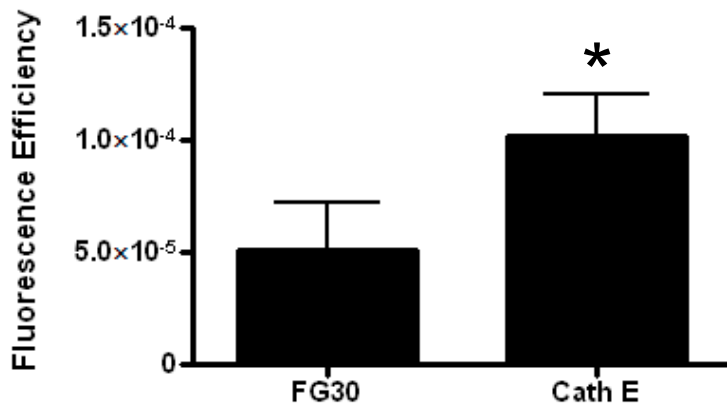

**D**

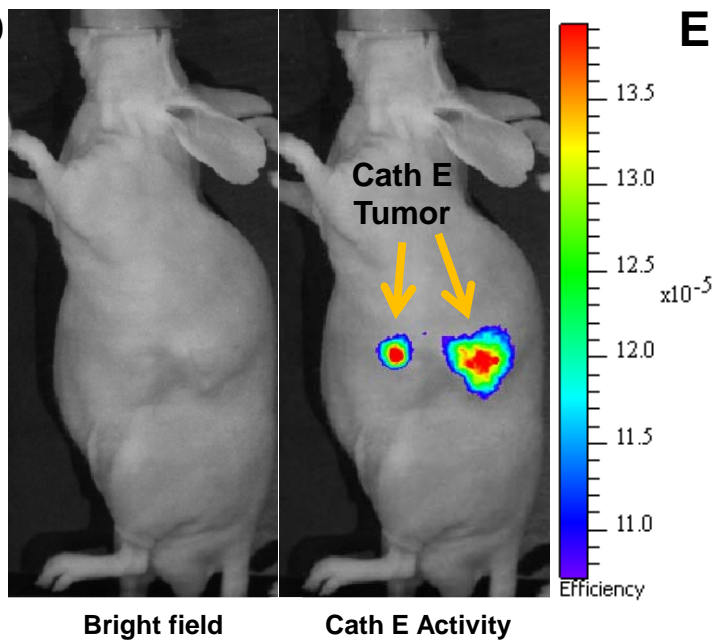

**E**

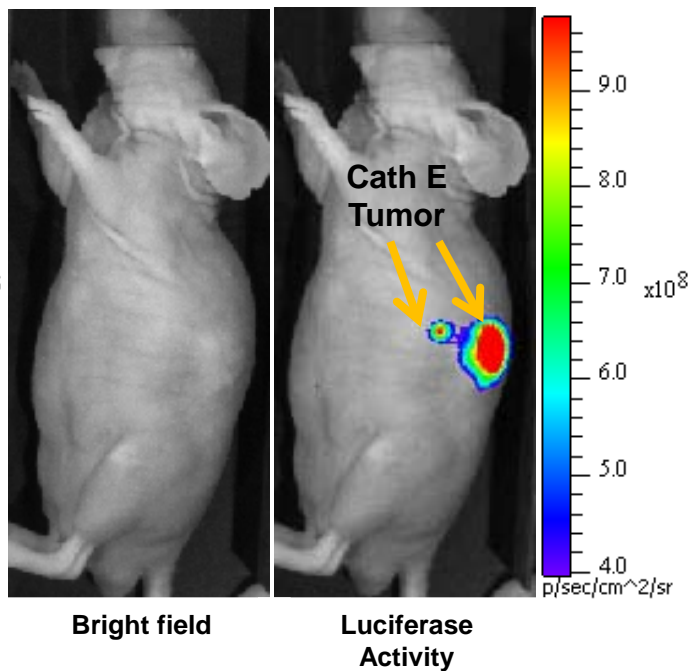

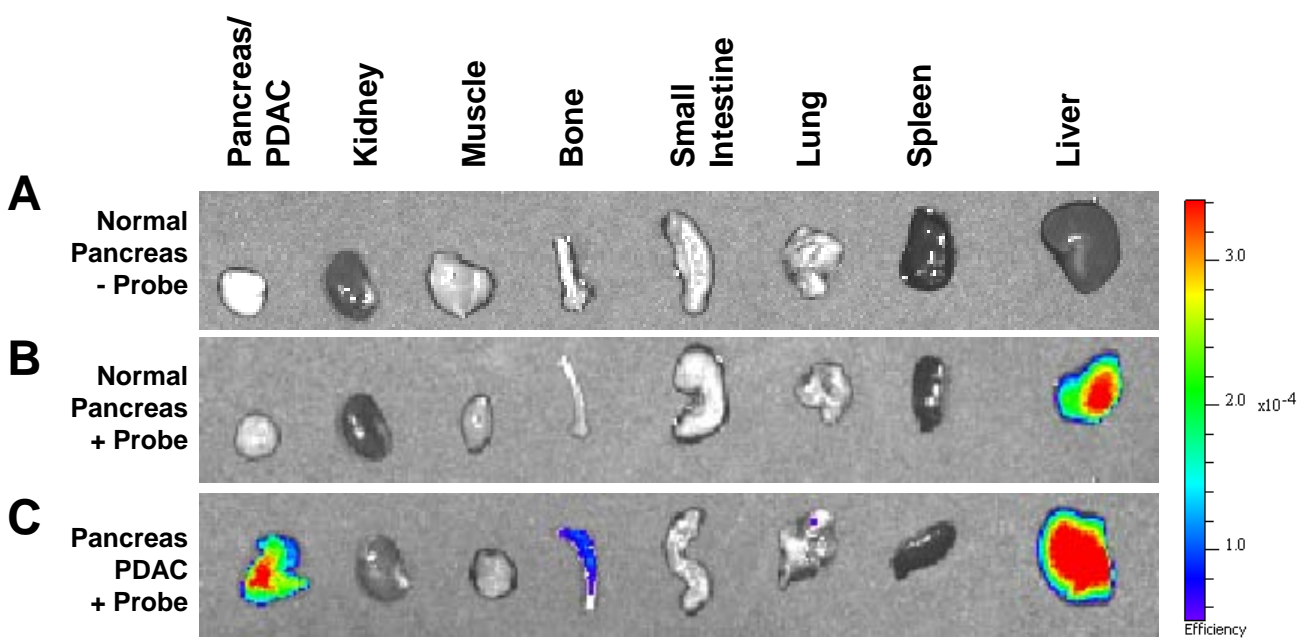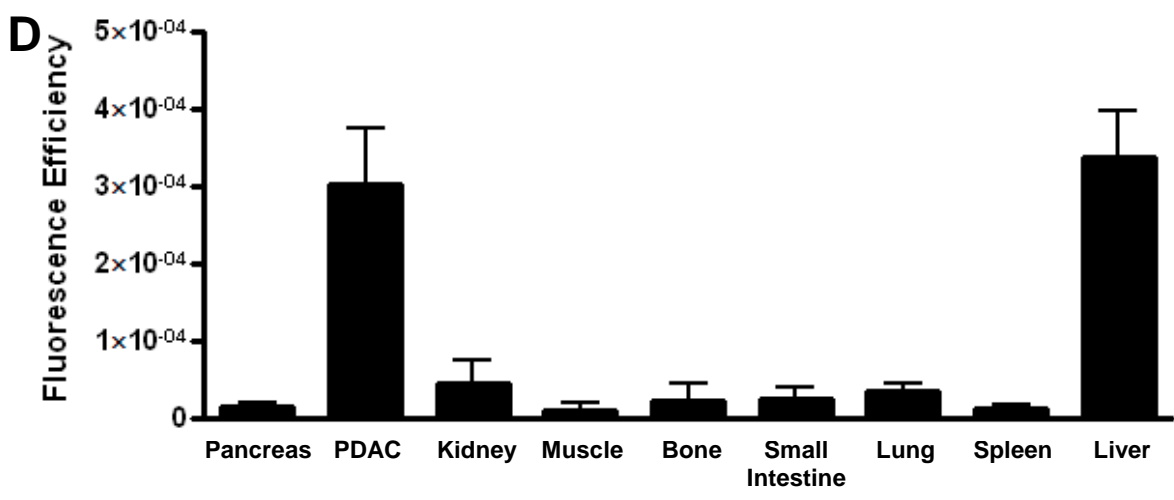

Supplement: NIHMS629087-supplement-Supplement.pdf [file NIHMS629087-supplement-Supplement.pdf]
